# Supplementary material for: Integrative transcriptome imputation reveals tissue-specific and shared biological mechanisms mediating susceptibility to complex traits
Source: PubMed Central journal article supplement (PMC6707297; doi:10.1038/s41467-019-11874-7), 2019-08-23
Supplement: 41467_2019_11874_MOESM14_ESM.pdf [file 41467_2019_11874_MOESM14_ESM.pdf]

**Editorial Note:** This manuscript has been previously reviewed at another journal that is not operating a transparent peer review scheme. The manuscript was considered suitable for publication without further review at *Nature Communications*.
